# Supplementary material for: Copper Nanowires as Highly Efficient and Recyclable Catalyst for Rapid Hydrogen Generation from Hydrolysis of Sodium Borohydride
Source: PubMed Central journal article supplement (PMC7353277; doi:10.3390/nano10061153), 2020-06-12
Supplement: nanomaterials-10-01153-s001.pdf [file nanomaterials-10-01153-s001.pdf]

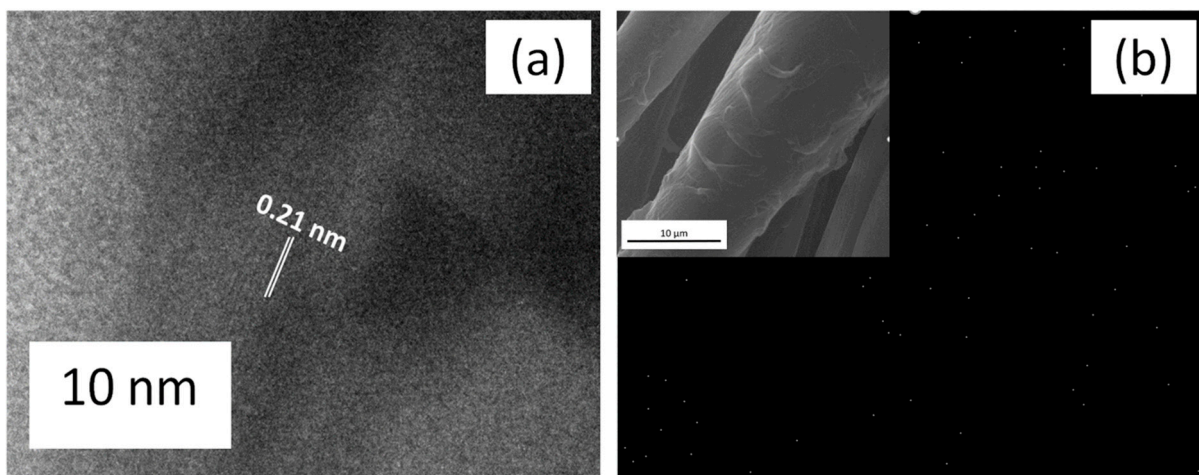

**Figure S1.** (a) HRTEM image of CuNWs, and (b) EDX mapping of the CuNWs/CC sample containing 0.1 pg CuNWs.
